# Supplementary material
Source: PubMed Central journal article supplement (PMC2538945)

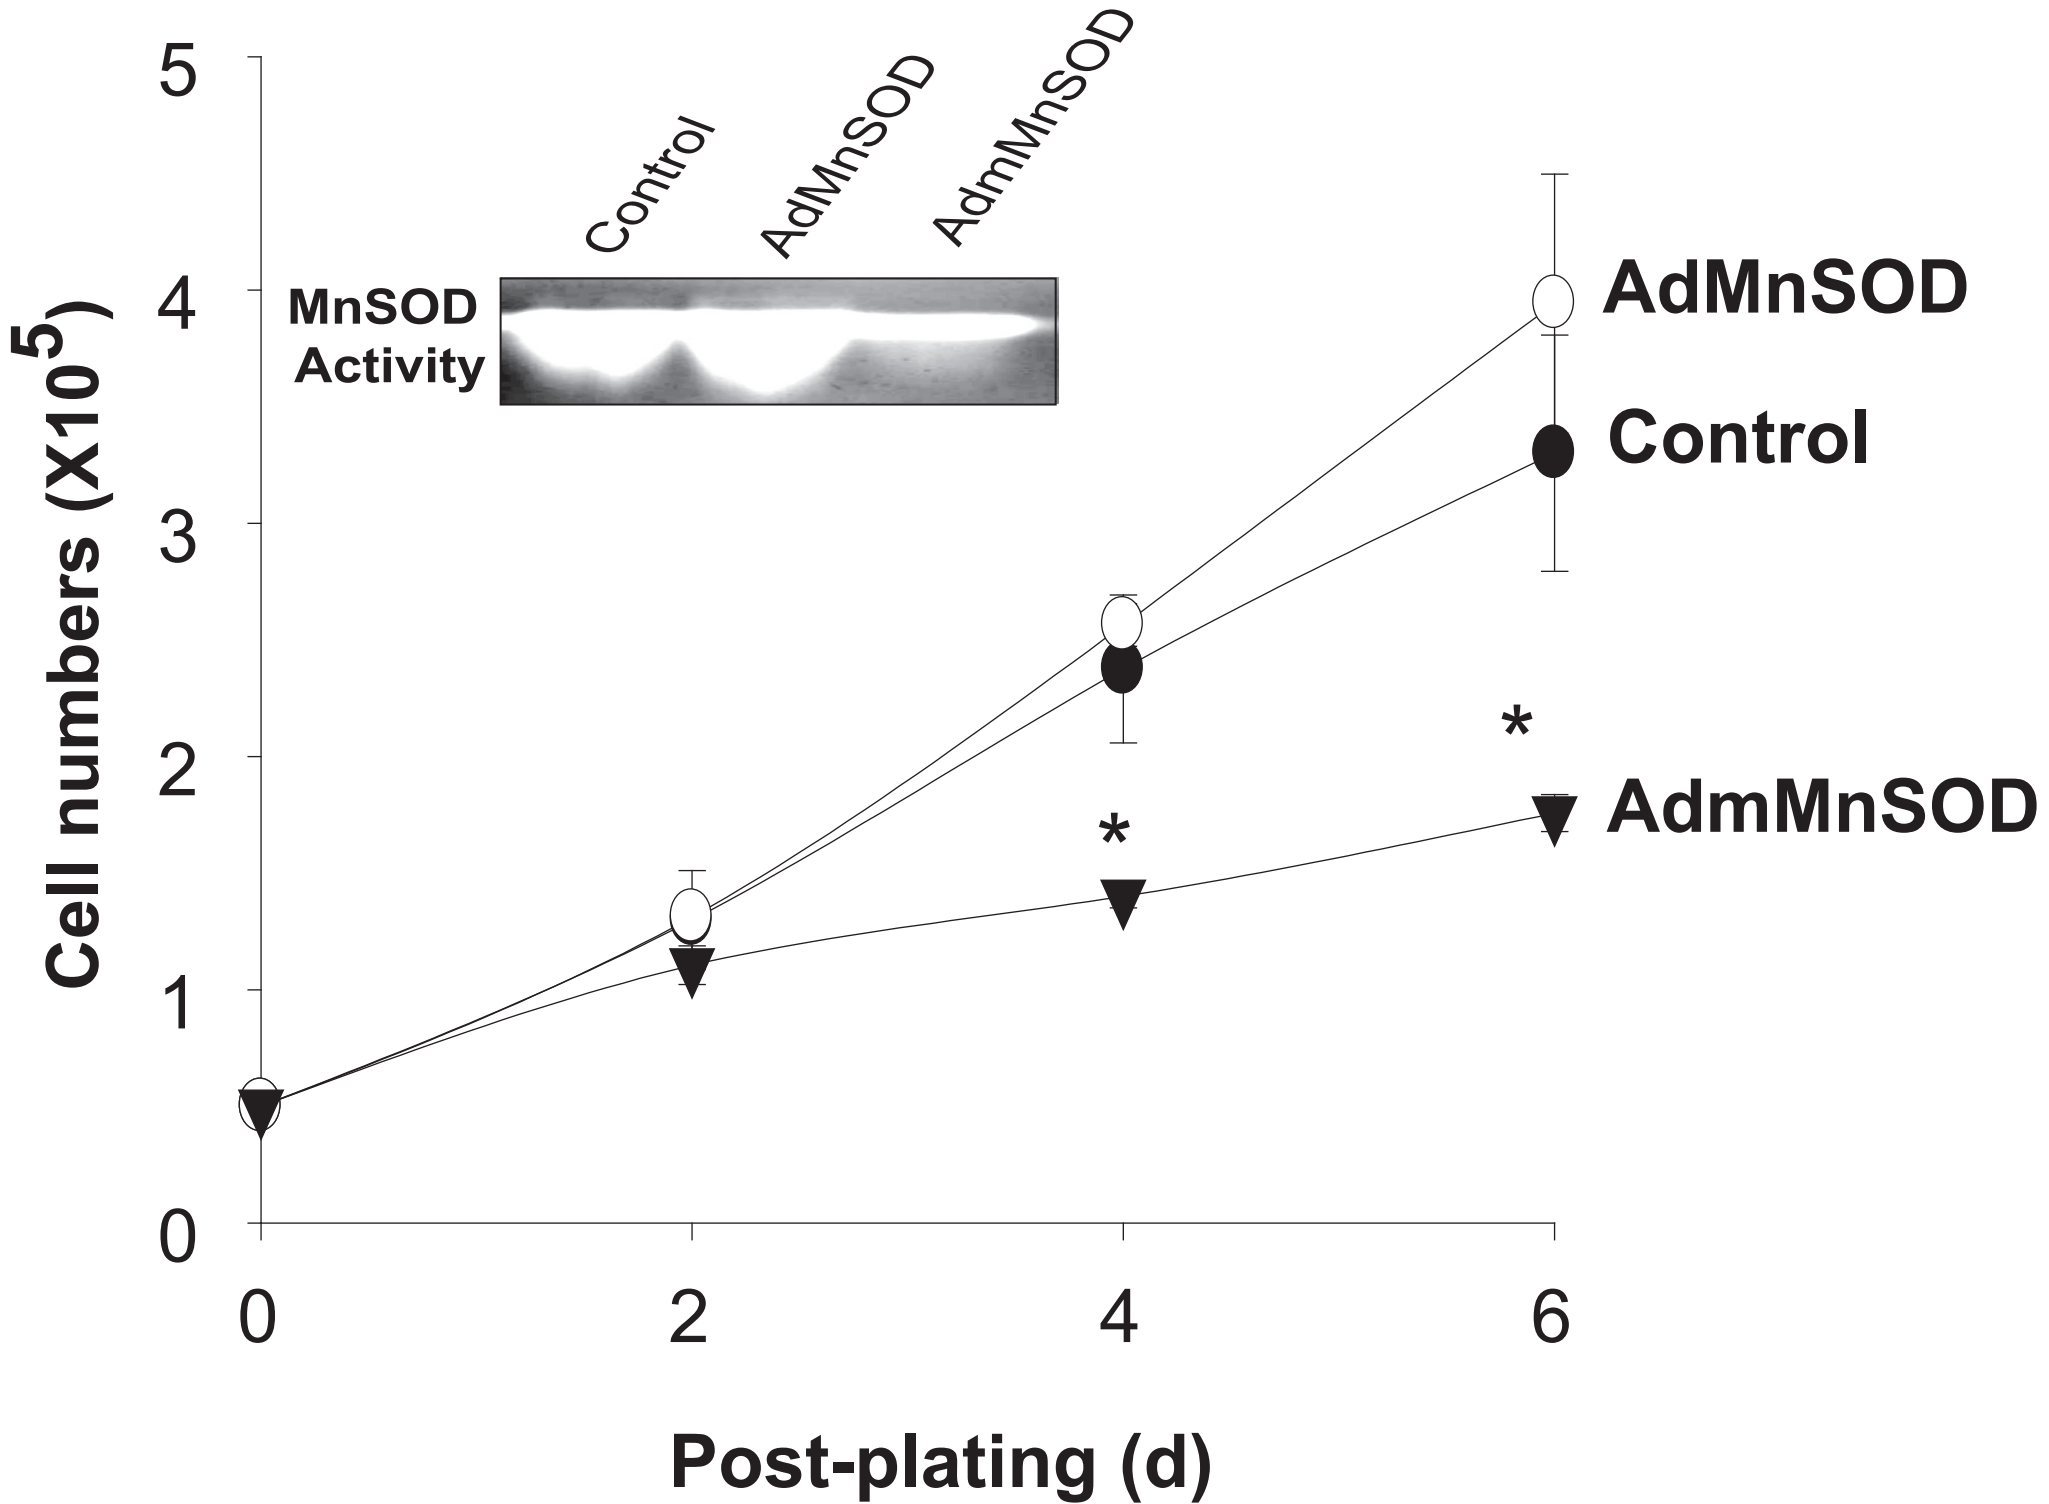

**A.**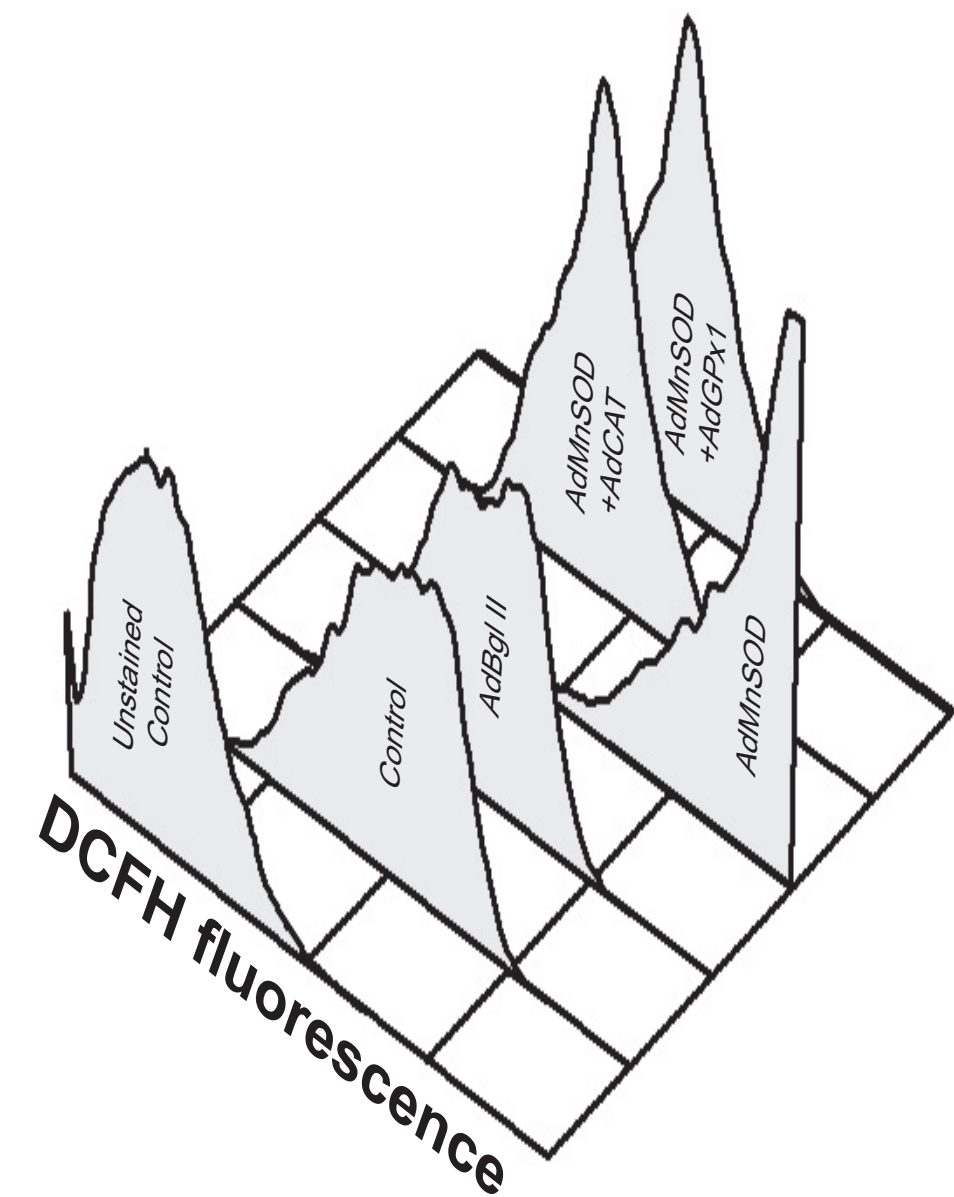**B.**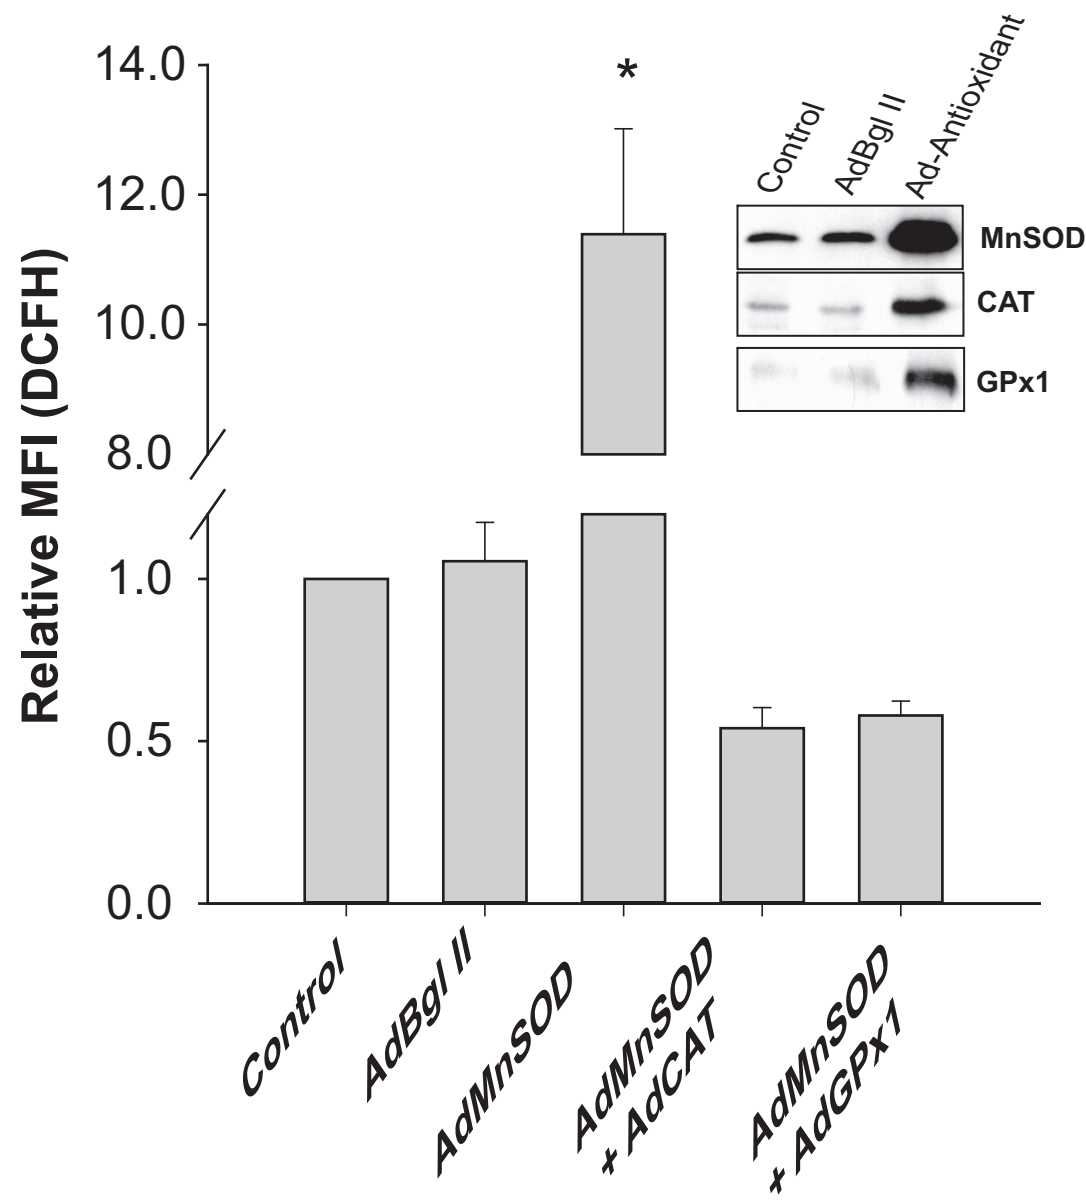

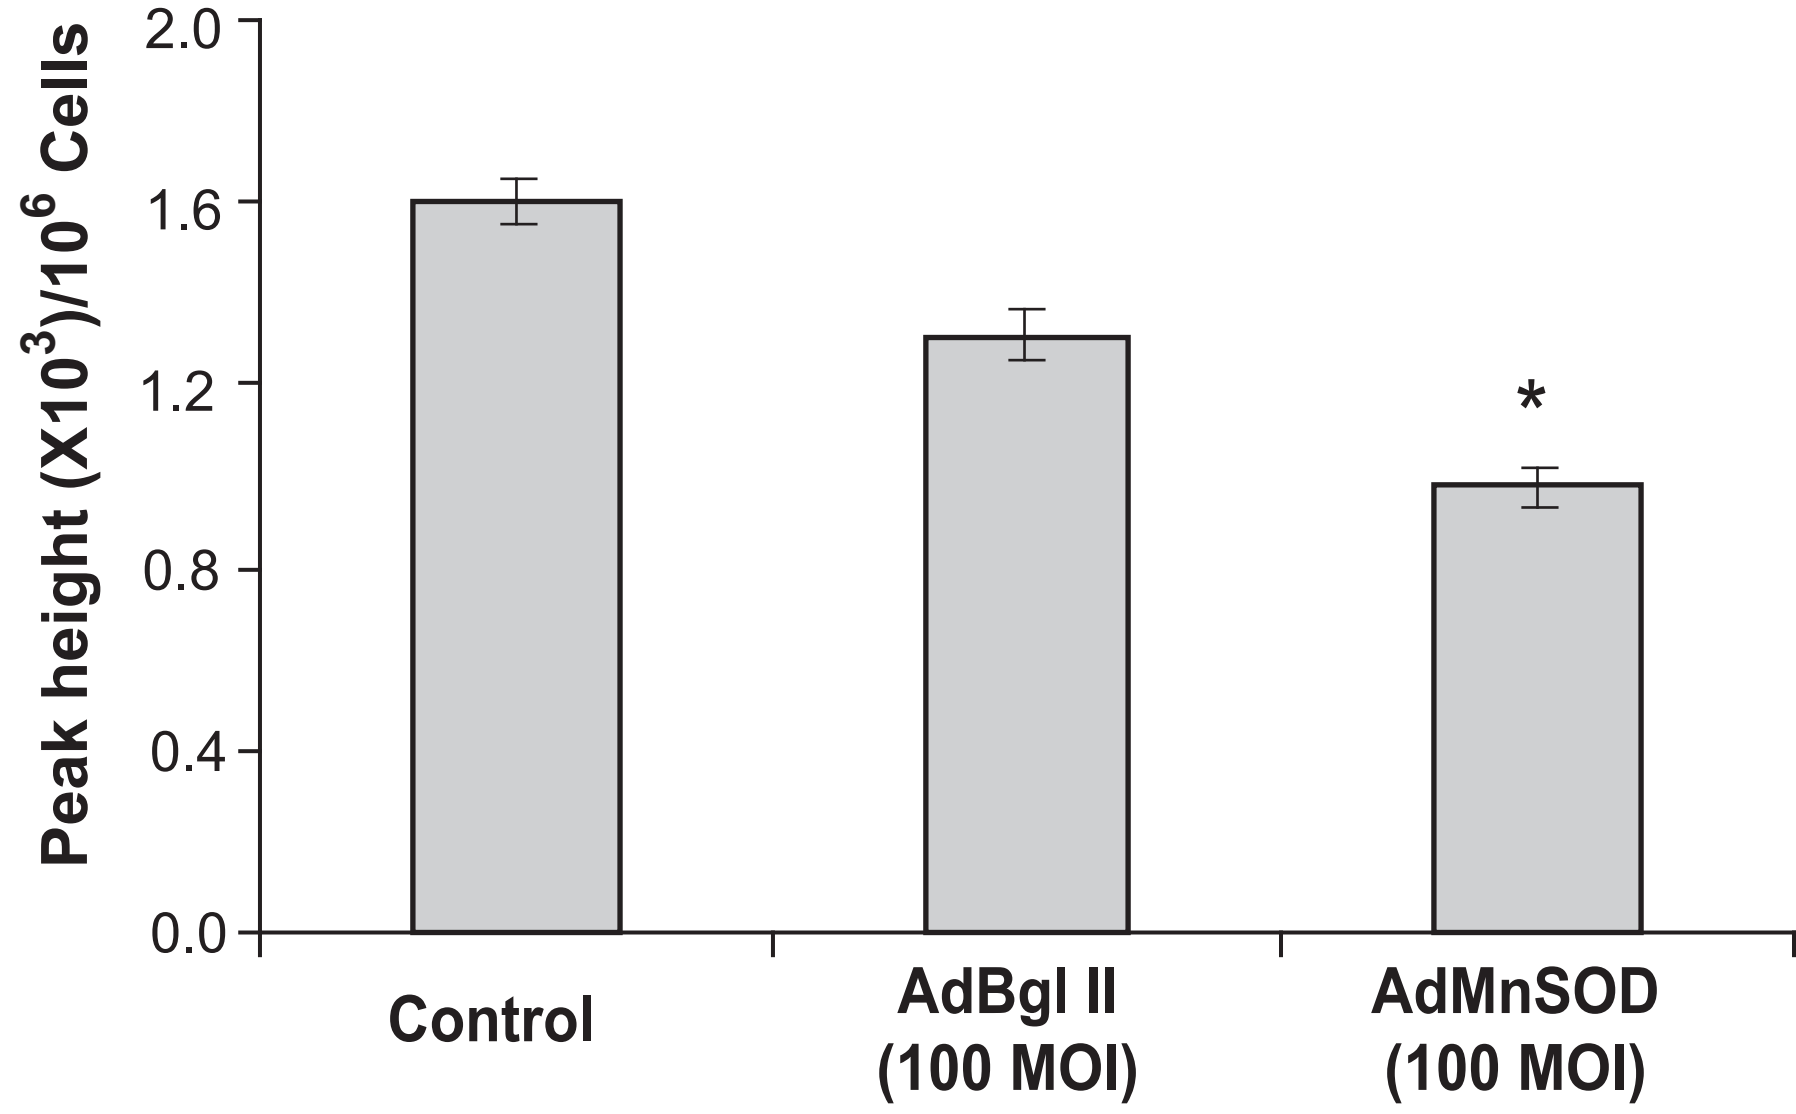

Supplement: NIHMS59373-supplement-1.pdf [file NIHMS59373-supplement-1.pdf]
